# Supplementary material for: A Novel Mouse Model of Type 2 Diabetes Using a Medium‒Fat Diet, Fructose, and Streptozotocin to Study the Complications of Human Disease
Source: Research Square preprint supplement (doi:10.21203/rs.3.rs-5920886/v1), 2025-03-12
Supplement: Supplementary file 2 [file c8b05e08018ed5735bcbdec6.docx]

| ***Table 1 Supplementary Material*** | | |
| --- | --- | --- |
| ***Composition of the Solid Diets Used (calculated in 100g)*** | | |
|  | ***Dieta Control*** | ***MFD*** |
| **Moisture (max)** | 12,0% | 10,0% |
| **Proteins (min)** | 23,0% | 28,0% |
| **Carbohydrates*** | 50,0% | 39,5% |
| *Crude Fiber (max)* | 6,0% | 3,5% |
| **Fat (min)** | 5,0% | 15,0% |
| **Total minerals** | 10,0% | 7,5% |
| *Calcium (min. - max.)* | 1% - 1,4% | 1,5% - 1,7% |
| *Phosphorus (min. - max.)* | 0,5% - 0,8% | 1,1% - 1,4% |

**Online Supplemental Materials**


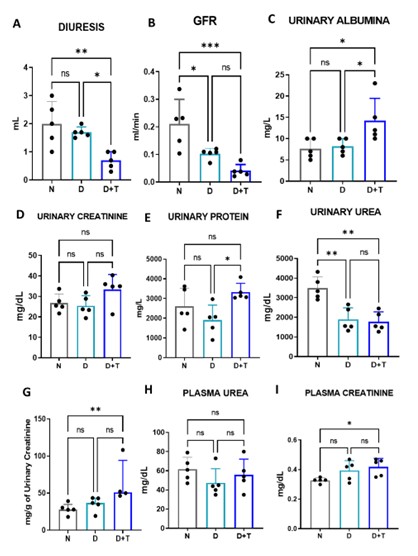


***Supplementary Figure 1. Analysis of urinary parameters in a diabetic model during an 18- hour time window utilizing a metabolic cage. (A) urine output volume, (B) glomerular filtration rate (GFR), (C) urinary albumin, (D) urinary creatinine, (E) total urinary protein, (F) urinary urea, (G) plasma creatine rate and urinary creatinine ratio, (H) plasma urea, (I) plasma creatinine. N (n= 5), D (n= 5), D+T (n=5). (*) p ≤ 0.05; (**) p< 0.01; ns: non-significant.***
